# Supplementary material for: Hydrazine High-Performance Oxidation and Sensing Using a Copper Oxide Nanosheet Electrocatalyst Prepared via a Foam-Surfactant Dual Template
Source: MDPI journal article supplement (doi:10.3390/nano13010129), 2022-12-26
Supplement: s1 [file s1]

Supplementary Materials

# Hydrazine High-Performance Oxidation and Sensing Using Copper Oxide Nanosheet Electrocatalyst Prepared via Foam-Surfactant Dual Template

Etab M. Almutairi, Mohamed A. Ghanem \*, Abdulrahman Al-Warthan, Mufsir Kuniyil and Syed F. Adil

Chemistry Department, College of Science, King Saud University, Riyadh 11451, Saudi Arabia

\* Correspondence: mghanem@ksu.edu.sa; Tel.: +966-114670405; Fax: +966-14675992

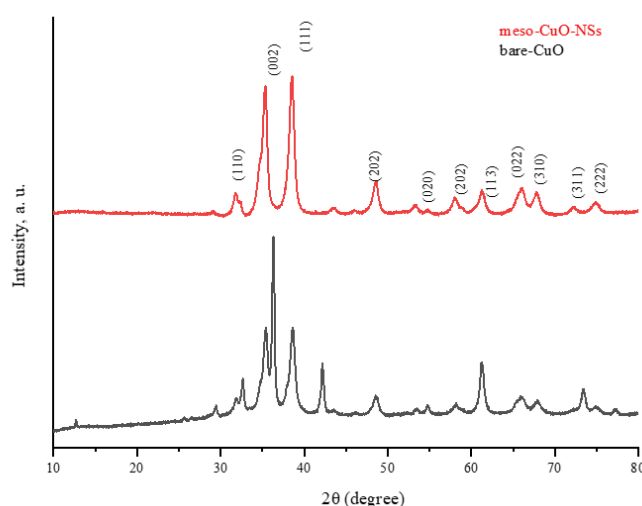

Figure S1. XRD of CuO-NSs and *bare*-CuO.

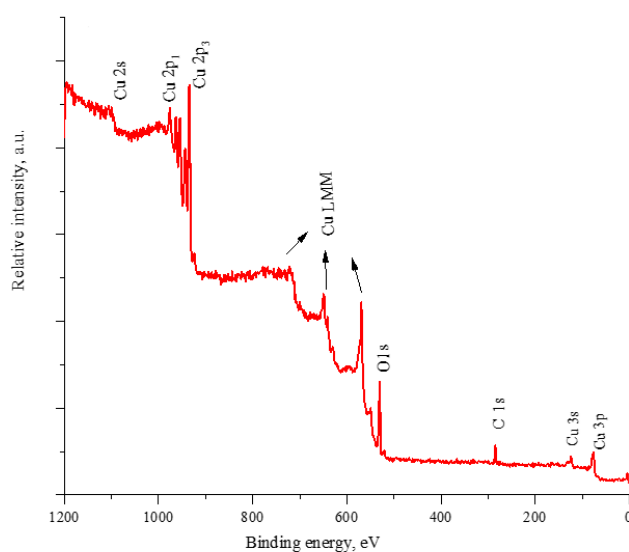

Figure S2. The XPS survey spectrum of as-prepared CuO-NS.

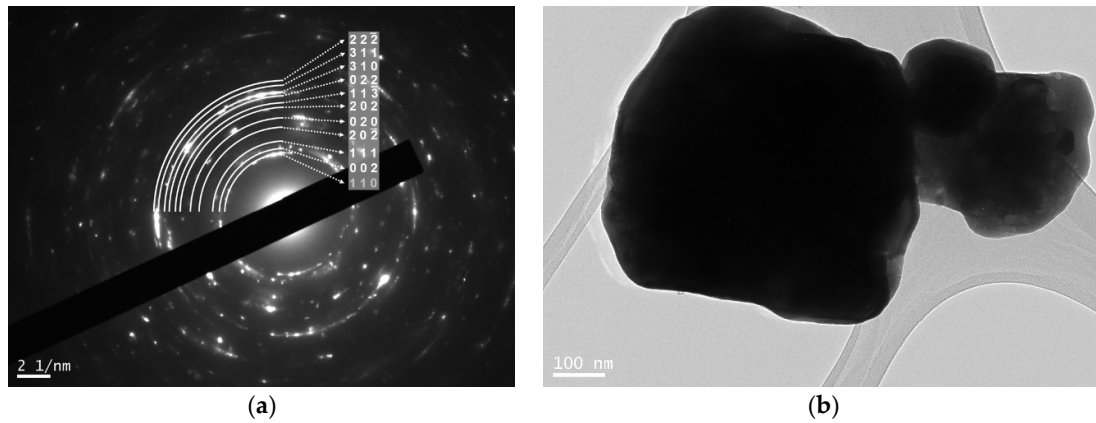

**Figure S3.** (a) the SAED pattern of the CuO nanosheets, and (b) TEM image of the *bare*-CuO catalyst deposited in the absence of the surfactant.

**Table S1.** Results for detection of hydrazine from different water sources injected with known concentration of hydrazine.

| Sample        | Determined Real Sample ( $\mu\text{M}$ ) | Hydrazine Spiked ( $\mu\text{M}$ ) | Hydrazine Recovered (mM) | Mean of Hydrazine Recovered (mM) | RSD <sup>a</sup> (%) | Recovery <sup>b</sup> (%) |
|---------------|------------------------------------------|------------------------------------|--------------------------|----------------------------------|----------------------|---------------------------|
| Tap water     | 0.00                                     | 0                                  | 0.00                     |                                  |                      |                           |
|               |                                          | 1                                  | 1.13, 1.07, 1.05         | $1.083 \pm 0.0339$               | 3.1378               | 108.3                     |
|               |                                          | 2                                  | 2.21, 2.03, 2.18         | $2.13 \pm 0.0787$                | 3.696717             | 106.5                     |
|               |                                          | 3                                  | 3.23, 3.24, 3.233        | $3.234 \pm 0.0053$               | 0.164167             | 107.66                    |
|               |                                          | 4                                  | 4.0, 4.076, 4.0          | $4.024 \pm 0.0367$               | 0.913756             | 100.65                    |
|               |                                          | 5                                  | 4.74, 4.97, 4.876        | $4.864 \pm 0.0935$               | 1.923271             | 97.285                    |
|               |                                          | 6                                  | 6.0, 5.71, 5.76          | $5.8525 \pm 0.125$               | 2.15714              | 97.08                     |
| Bottled water | 0                                        | 0                                  |                          |                                  |                      |                           |
|               |                                          | 1                                  | 1.15, 1.0, 1.1           | $1.063 \pm 0.0531$               | 4.99                 | 106.33                    |
|               |                                          | 2                                  | 2.15, 2.13, 2.08         | $2.12 \pm 0.029$                 | 1.38                 | 106                       |
|               |                                          | 3                                  | 3.0, 3.0, 3.13           | $3.043 \pm 0.061$                | 2.0139               | 101.44                    |
|               |                                          | 4                                  | 4.0, 4.0, 4.06           | $4.02 \pm 0.028$                 | 0.704                | 100.5                     |
|               |                                          | 5                                  | 5.0, 5.0, 4.876          | $4.958 \pm 0.058$                | 1.179                | 99.173                    |
|               |                                          | 6                                  | 5.98, 6.0, 6.0           | $5.995 \pm 0.007$                | 1.25                 | 99.911                    |

<sup>a</sup> RSD: relative standard deviation for three independent measurements; <sup>b</sup> Recovery =  $(C_{\text{predicted}})/(C_{\text{spiked}}) \times 100$ .
